# Supplementary material for: The Association between Sugar-Sweetened Beverages and Male Pattern Hair Loss in Young Men
Source: MDPI journal article supplement (doi:10.3390/nu15010214), 2023-01-01
Supplement: s1 [file s1]

**Table S1. Association between SSB and MPHL in participants without clinical treatment.**

|                              | MPHL/all cases | Model 1          | Model 2          | Model 3          | Model 4          |
|------------------------------|----------------|------------------|------------------|------------------|------------------|
| <b>SSBs intake frequency</b> |                |                  |                  |                  |                  |
| Never                        | 45/118         | 1.00 (Reference) | 1.00 (Reference) | 1.00 (Reference) | 1.00 (Reference) |
| 1-3 times per week           | 81/184         | 1.28[0.80,2.05]  | 1.15[0.69,1.93]  | 1.15[0.68,1.97]  | 1.22[0.71,2.09]  |
| 4-7 times per week           | 137/253        | 1.92[1.23,2.99]  | 1.67[1.02,2.75]  | 1.43[0.85,2.41]  | 1.35[0.79,2.30]  |
| >7 times per week            | 293/436        | 3.32[2.18,5.07]  | 2.09[1.29,3.40]  | 1.82[1.08,3.04]  | 1.60[0.95,2.71]  |
| <b>SSBs intake amount</b>    |                |                  |                  |                  |                  |
| Never                        | 45/118         | 1.00 (Reference) | 1.00 (Reference) | 1.00 (Reference) | 1.00 (Reference) |
| Small amount                 | 188/356        | 1.82[1.19,2.78]  | 1.51[0.94,2.42]  | 1.37[0.84,2.23]  | 1.39[0.84,2.30]  |
| Middle amount                | 162/281        | 2.21[1.42,3.43]  | 1.75[1.07,2.86]  | 1.48[0.88,2.50]  | 1.40[0.82,2.39]  |
| Large amount                 | 161/236        | 3.48[2.19,5.53]  | 1.81[1.07,3.07]  | 1.61[0.92,2.81]  | 1.33[0.75,2.36]  |

Model 1 had no adjustment for confounders; Model 2 adjusted: age, education level, BMI, smoking status, alcohol intake, family history, hair dyeing/ perming/ bleaching/ relaxing, sleep time and physical activity; Model 3 based on model 2 further adjusted consumption of vegetables, meats, eggs, beans and bean products, oils and fats, deep fried food, sugar and honey, sweets and ice cream; Model 4 based on model 3 further adjusted PTSD.

**Table S2. Association between SSB and MPHL in participants without PTSD.**

|                              | MPHL/all cases | Model 1          | Model 2          | Model 3          |
|------------------------------|----------------|------------------|------------------|------------------|
| <b>SSBs intake frequency</b> |                |                  |                  |                  |
| Never                        | 29/96          | 1.00 (Reference) | 1.00 (Reference) | 1.00 (Reference) |
| 1-3 times per week           | 60/152         | 1.51[0.87,2.60]  | 1.29[0.72,2.34]  | 1.27[0.69,2.35]  |
| 4-7 times per week           | 85/172         | 2.26[1.33,3.83]  | 1.97[1.10,3.53]  | 1.59[0.86,2.96]  |
| >7 times per week            | 121/228        | 2.61[1.57,4.34]  | 1.76[0.99,3.13]  | 1.48[0.80,2.76]  |
| <b>SSBs intake amount</b>    |                |                  |                  |                  |
| Never                        | 29/96          | 1.00 (Reference) | 1.00 (Reference) | 1.00 (Reference) |
| Small amount                 | 123/266        | 1.99[1.21,3.27]  | 1.69[0.97,2.91]  | 1.48[0.83,2.61]  |
| Middle amount                | 84/177         | 2.09[1.23,3.53]  | 1.82[1.01,3.28]  | 1.47[0.78,2.74]  |
| Large amount                 | 59/109         | 2.73[1.53,4.85]  | 1.32[0.68,2.55]  | 1.23[0.61,2.48]  |

Model 1 had no adjustment for confounders; Model 2 adjusted: age, education level, BMI, smoking status, alcohol intake, family history, hair dyeing/ perming/ bleaching/ relaxing, sleep time and physical activity; Model 3 based on model 2 further adjusted consumption of vegetables, meats, eggs, beans and bean products, oils and fats, deep fried food, sugar and honey, sweets and ice cream.

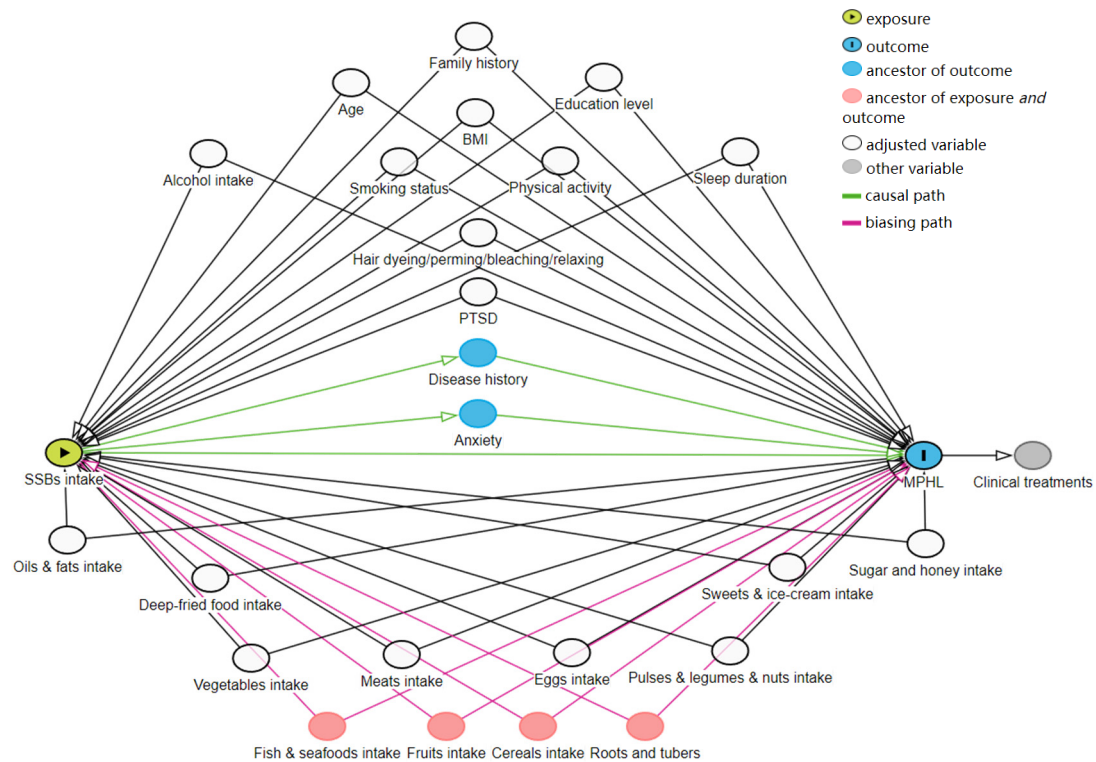

**Figure S1. Direct Acyclic Graph for the association of SSBs intake and MPHL status in China, created using DAGitty version 3.0**
